# Supplementary material
Source: ML conference proceedings conference paper supplement (https://openreview.net/forum?id=tV4yO6bOoy)
Supplement: supplementary_material [file Code_and_Dataset_Access.pdf › Code_and_Dataset_Access.pdf]

000  
001  
002  
003  
004  
005  
006  
007  
008  
009  
010  
011  
012  
013  
014  
015  
016  
017  
018  
019  
020  
021  
022  
023  
024  
025  
026  
027  
028  
029  
030  
031  
032  
033  
034  
035  
036  
037  
038  
039  
040  
041  
042  
043  
044  
045  
046  
047  
048  
049  
050  
051  
052  
053

---

## SUPPLEMENTARY MATERIALS

We provide our code and dataset through anonymized links for review: <https://github.com/neutral-coder-737/Home-Page>.

- All code is publicly accessible.
- For confidentiality, the dataset is provided as an encrypted zip file (password: hx9k737).
